# Supplementary material for: Embryonic Nicotine Exposure Disrupts Adult Social Behavior and Craniofacial Development in Zebrafish
Source: MDPI journal article supplement (doi:10.3390/toxics10100612), 2022-10-15
Supplement: s1 [file s1]

Supplementary Materials

# Embryonic Nicotine Exposure Disrupts Adult Social Behavior and Craniofacial Development in Zebrafish

Gissela Borrego-Soto and Johann K. Eberhart \*

Department of Molecular Biosciences, School of Natural Sciences, University of Texas at Austin, Austin, TX 78713, USA

\* Correspondence: eberhart@austin.utexas.edu; Tel.: +1-512-232-8340

**Figure S1.** Behavioral analyses between males and females. No statistical differences were observed between males and females in any of the variables analyzed both in the habituation period and when the live shoal is present. DMSO n = Male 15, Female 7; Nicotine 12.5  $\mu$ M n = Male 17, Female 11; Nicotine 25  $\mu$ M n = Male 22, Female 8; Nicotine 50  $\mu$ M n = Male 13, Female 10.

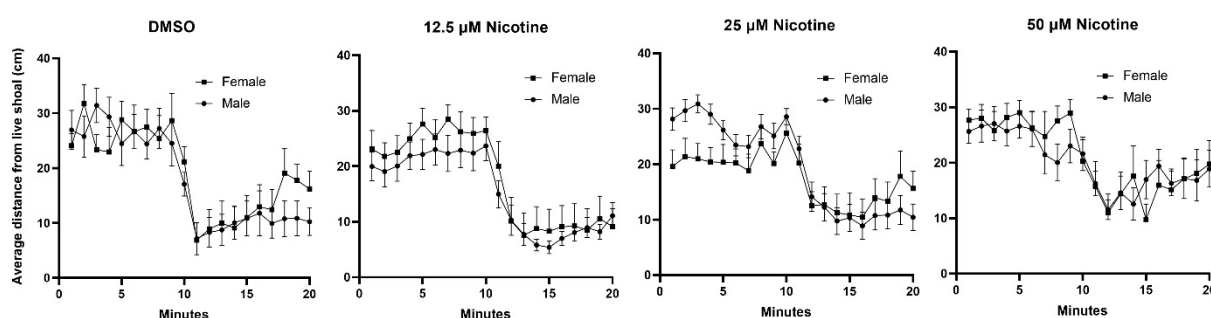

**Figure S1. A.** Average distance between the experimental fish and the live shoal plotted by minute of the 20-minute behavioral session.

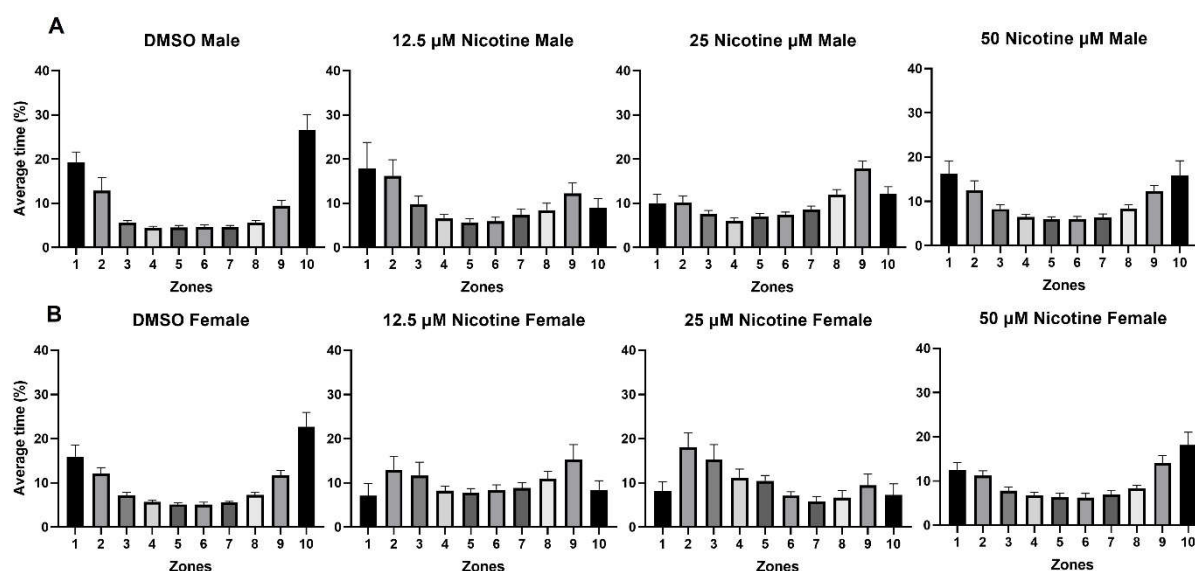

**Figure S1. B.** Bars represent the time that (A) males and (B) females spent in each of the 10 zones during the first 10 minutes of habituation.

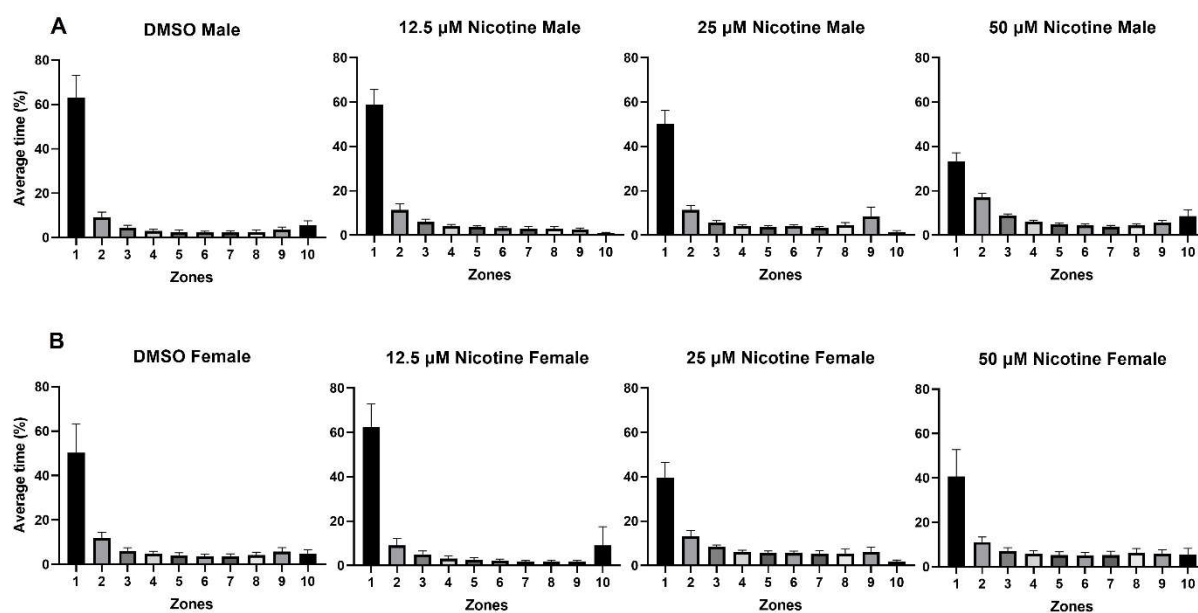

**Figure S1. C.** Bars represent the time that (A) males and (B) females spent in each of the 10 zones during the last 10 minutes of the behavioral session when the stimulus is visible.

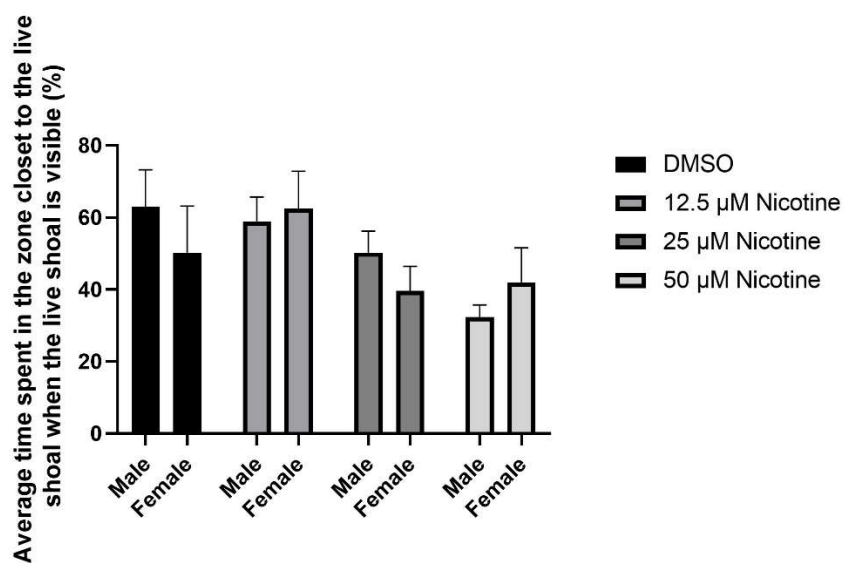

**Figure S1. D.** Bars represent the average percentage of time spent in the zone closest to the live shoal while the live shoal was visible.

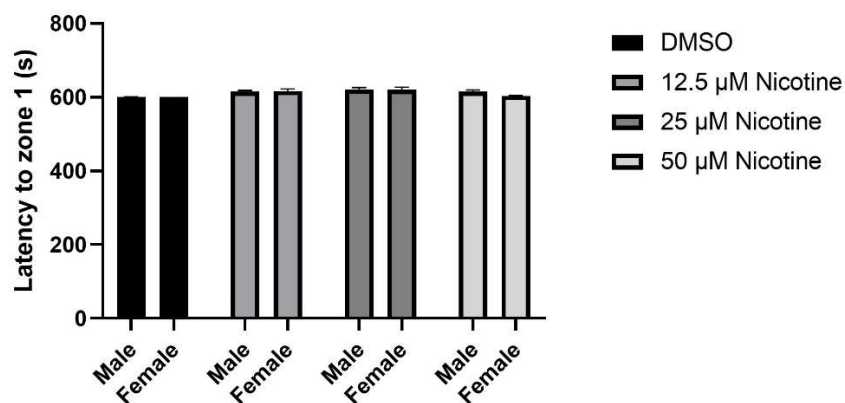

Figure S1. E. Bars represent the time fish take to reach zone 1.

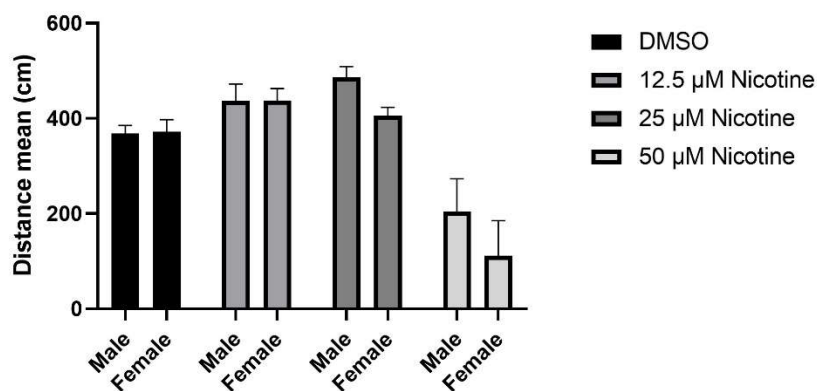

Figure S1. F. Total distance traveled during habituation.

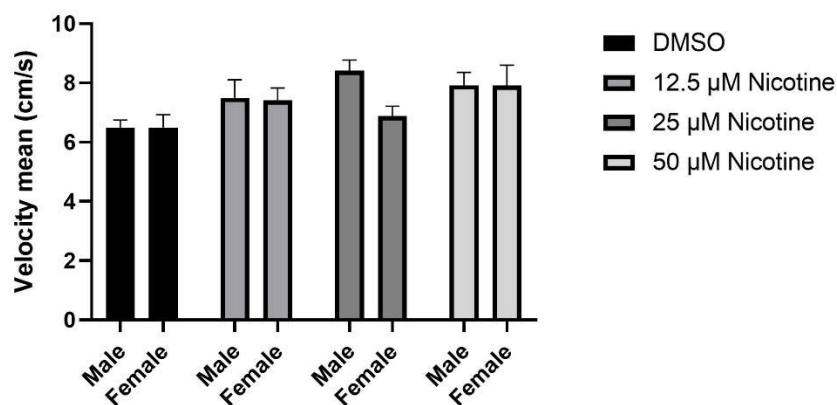

Figure S1. G. Mean velocity during habituation.

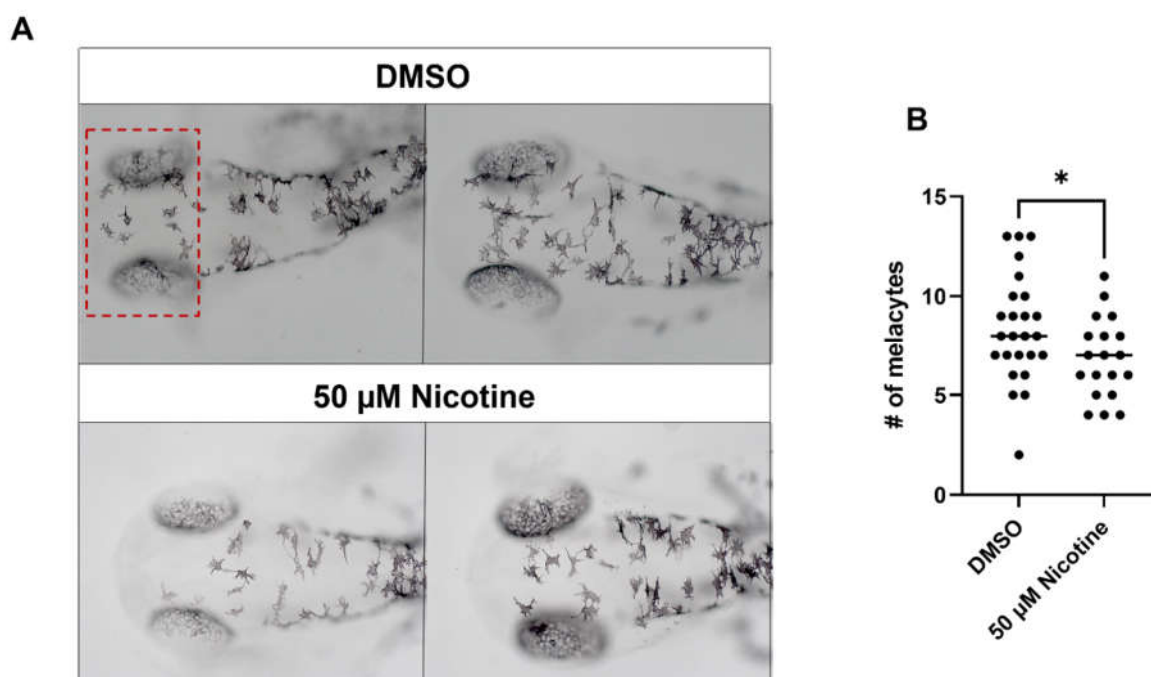

**Figure S2.** Melanocyte analysis in embryos exposed to DMSO and 50 µM nicotine. Zebrafish embryos were exposed to DMSO and 50 µM Nicotine from 6 to 36 hpf. Yolks were removed and images were collected. (A) Melanocytes were counted manually in the red dotted area. (B) Nicotine exposure caused a statistically significant reduction in the number of melanocytes ( $P = 0.0474$ ; DMSO  $M = 8.6$ ,  $SEM \pm 0.53$ ; 50 µM Nicotine  $M = 6.8$ ,  $SEM \pm 0.45$ ). DMSO  $n = 25$ ; 50 µM Nicotine  $n = 19$ .  $* = p < 0.05$ .

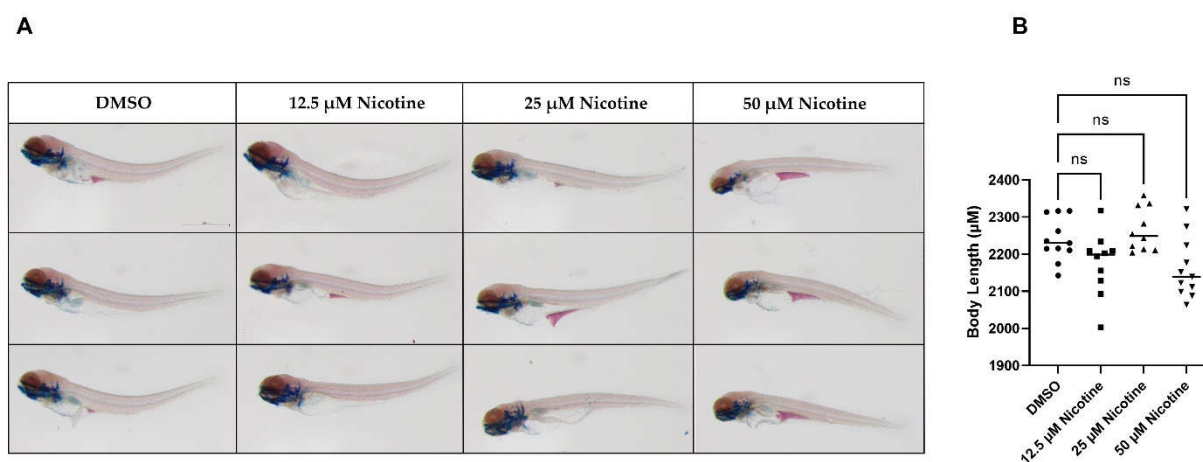

**Figure S3.** Body Length. (A) Total body length was measured at 4 dpf in all experimental groups. Curved bodies were observed at 50 µM Nicotine concentration. (B) No significant differences were found in the total body length (DMSO  $M = 2239.33$  µm,  $SEM \pm 16.68$ ; 12.5 µM Nicotine  $M = 2174.76$  µm,  $SEM \pm 25.72$ ,  $P = 0.1855$ ; 25 µM Nicotine  $M = 2265.66$ ,  $SEM \pm 17.40$ ,  $P = 0.8355$ ; 50 µM Nicotine  $M = 2161.30$ ,  $SEM \pm 23.32$ ,  $P = 0.0684$ ). DMSO  $n = 11$ ; 12.5 µM Nicotine  $n = 10$ ; 25 µM Nicotine  $n = 10$ ; 50 µM Nicotine  $n = 11$ .

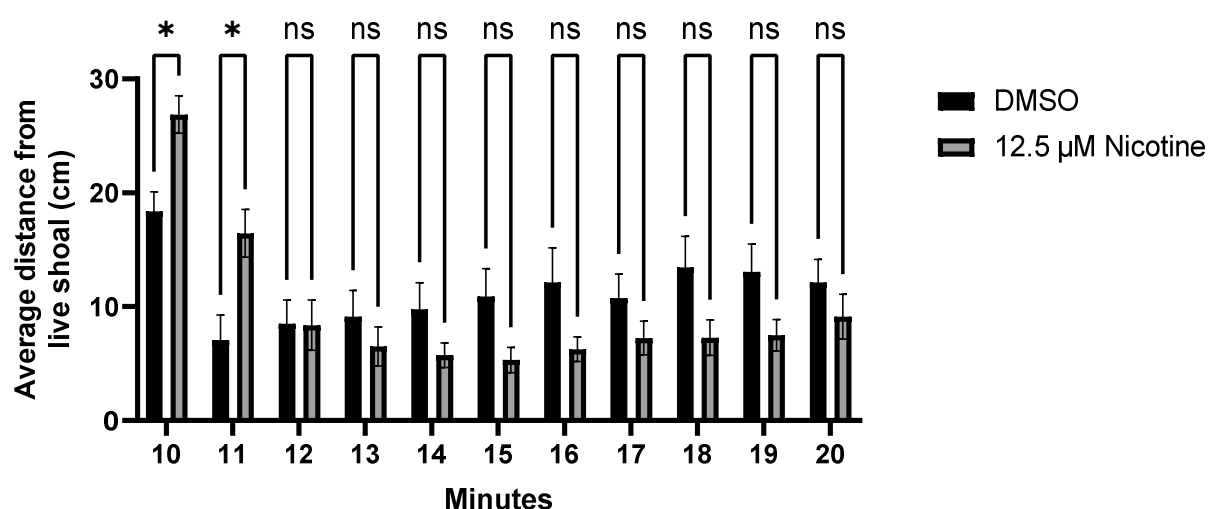

**Figure S4.** Average distance from the live shoal minute by minute between the DMSO and 12.5 µM Nicotine groups, when the shoal is visible. Statistical differences were only found in the minute 10 and 11 where the DMSO fish is closer to the stimulus than 12.5 µM fish. \* =  $p < 0.05$ .

**Table S1.** Figure 3. ANOVA P-value summary. \* =  $p < 0.05$ ; \*\* =  $p < 0.01$ ; \*\*\* =  $p < 0.001$ ; \*\*\*\* =  $p < 0.0001$ .

| Meckel's cartilage length           |            |                    |                  |         |                         |  |
|-------------------------------------|------------|--------------------|------------------|---------|-------------------------|--|
| Tukey's multiple comparisons test   | Mean Diff. | 95.00% CI of diff. | Below threshold? | Summary | Adjusted <i>P</i> Value |  |
| DMSO vs. 12.5 µM Nicotine           | 2.727      | −0.5182 to 5.972   | No               | ns      | 0.1321                  |  |
| DMSO vs. 25 µM Nicotine             | 8.007      | 4.762 to 11.25     | Yes              | ****    | <0.0001                 |  |
| DMSO vs. 50 µM Nicotine             | 13.47      | 10.32 to 16.61     | Yes              | ****    | <0.0001                 |  |
| 12.5 µM Nicotine vs. 25 µM Nicotine | 5.28       | 2.009 to 8.551     | Yes              | ***     | 0.0003                  |  |
| 12.5 µM Nicotine vs. 50 µM Nicotine | 10.74      | 7.567 to 13.91     | Yes              | ****    | <0.0001                 |  |
| 25 µM Nicotine vs. 50 µM Nicotine   | 5.461      | 2.287 to 8.635     | Yes              | ****    | <0.0001                 |  |

  

| Ceratohyal cartilage length         |            |                    |                  |         |                         |  |
|-------------------------------------|------------|--------------------|------------------|---------|-------------------------|--|
| Tukey's multiple comparisons test   | Mean Diff. | 95.00% CI of diff. | Below threshold? | Summary | Adjusted <i>P</i> Value |  |
| DMSO vs. Nicotine 12.5 µM           | 0.9995     | −0.6965 to 2.695   | No               | ns      | 0.4198                  |  |
| DMSO vs. Nicotine 25 µM             | 3.961      | 2.265 to 5.657     | Yes              | ****    | <0.0001                 |  |
| DMSO vs. Nicotine 50 µM             | 7.357      | 5.713 to 9.002     | Yes              | ****    | <0.0001                 |  |
| Nicotine 12.5 µM vs. Nicotine 25 µM | 2.962      | 1.252 to 4.671     | Yes              | ****    | <0.0001                 |  |
| Nicotine 12.5 µM vs. Nicotine 50 µM | 6.358      | 4.699 to 8.017     | Yes              | ****    | <0.0001                 |  |
| Nicotine 25 µM vs. Nicotine 50 µM   | 3.396      | 1.737 to 5.055     | Yes              | ****    | <0.0001                 |  |

  

| Palatoquadrate cartilage length     |            |                    |                  |         |                         |  |
|-------------------------------------|------------|--------------------|------------------|---------|-------------------------|--|
| Tukey's multiple comparisons test   | Mean Diff. | 95.00% CI of diff. | Below threshold? | Summary | Adjusted <i>P</i> Value |  |
| DMSO vs. Nicotine 12.5 µM           | 3.104      | 0.6457 to 5.563    | Yes              | **      | 0.0071                  |  |
| DMSO vs. Nicotine 25 µM             | 6.671      | 4.212 to 9.130     | Yes              | ****    | <0.0001                 |  |
| DMSO vs. Nicotine 50 µM             | 9.271      | 6.887 to 11.65     | Yes              | ****    | <0.0001                 |  |
| Nicotine 12.5 µM vs. Nicotine 25 µM | 3.567      | 1.088 to 6.045     | Yes              | **      | 0.0015                  |  |
| Nicotine 12.5 µM vs. Nicotine 50 µM | 6.166      | 3.762 to 8.571     | Yes              | ****    | <0.0001                 |  |
| Nicotine 25 µM vs. Nicotine 50 µM   | 2.6        | 0.1949 to 5.004    | Yes              | *       | 0.0286                  |  |

| Hyosimplete cartilage lenght        |            |                    |                  |         |                         |
|-------------------------------------|------------|--------------------|------------------|---------|-------------------------|
| Tukey's multiple comparisons test   | Mean Diff. | 95.00% CI of diff. | Below threshold? | Summary | Adjusted <i>P</i> Value |
| DMSO vs. Nicotine 12.5 µM           | 1.588      | −1.262 to 4.439    | No               | ns      | 0.47                    |
| DMSO vs. Nicotine 25 µM             | 10.44      | 7.591 to 13.29     | Yes              | ****    | <0.0001                 |
| DMSO vs. Nicotine 50 µM             | 10.28      | 7.519 to 13.05     | Yes              | ****    | <0.0001                 |
| Nicotine 12.5 µM vs. Nicotine 25 µM | 8.853      | 5.979 to 11.73     | Yes              | ****    | <0.0001                 |
| Nicotine 12.5 µM vs. Nicotine 50 µM | 8.695      | 5.907 to 11.48     | Yes              | ****    | <0.0001                 |
| Nicotine 25 µM vs. Nicotine 50 µM   | −0.158     | −2.946 to 2.630    | No               | ns      | 0.9988                  |

**Table S2.** Figure 4. ANOVA P-value summary. \* =  $p < 0.05$ ; \*\* =  $p < 0.01$ ; \*\*\* =  $p < 0.001$ ; \*\*\*\* =  $p < 0.0001$ .

| Neurocranium Length                 |            |                    |                  |         |                         |
|-------------------------------------|------------|--------------------|------------------|---------|-------------------------|
| Tukey's multiple comparisons test   | Mean Diff. | 95.00% CI of diff. | Below threshold? | Summary | Adjusted <i>P</i> Value |
| DMSO vs. 12.5 µM Nicotine           | 11.21      | −3.436 to 25.85    | No               | ns      | 0.179                   |
| DMSO vs. 25 µM Nicotine             | 19.45      | 5.413 to 33.48     | Yes              | **      | 0.0042                  |
| DMSO vs. 50 µM Nicotine             | 18.63      | 5.067 to 32.18     | Yes              | **      | 0.0045                  |
| 12.5 µM Nicotine vs. 25 µM Nicotine | 8.238      | −6.848 to 23.32    | No               | ns      | 0.4513                  |
| 12.5 µM Nicotine vs. 50 µM Nicotine | 7.417      | −7.227 to 22.06    | No               | ns      | 0.5151                  |
| 25 µM Nicotine vs. 50 µM Nicotine   | −0.8214    | −14.85 to 13.21    | No               | ns      | 0.9985                  |
| Anterior Neurocranium Length        |            |                    |                  |         |                         |
| Tukey's multiple comparisons test   | Mean Diff. | 95.00% CI of diff. | Below threshold? | Summary | Adjusted <i>P</i> Value |
| DMSO vs. 12.5 µM Nicotine           | 8.635      | 1.105 to 16.17     | Yes              | *       | 0.0203                  |
| DMSO vs. 25 µM Nicotine             | 12.61      | 5.389 to 19.82     | Yes              | ***     | 0.0003                  |
| DMSO vs. 50 µM Nicotine             | 11.13      | 4.154 to 18.10     | Yes              | ***     | 0.001                   |
| 12.5 µM Nicotine vs. 25 µM Nicotine | 3.97       | −3.787 to 11.73    | No               | ns      | 0.5064                  |
| 12.5 µM Nicotine vs. 50 µM Nicotine | 2.491      | −5.040 to 10.02    | No               | ns      | 0.7998                  |
| 25 µM Nicotine vs. 50 µM Nicotine   | −1.48      | −8.697 to 5.737    | No               | ns      | 0.9418                  |
| Posterior Neurocranium Length       |            |                    |                  |         |                         |
| Tukey's multiple comparisons test   | Mean Diff. | 95.00% CI of diff. | Below threshold? | Summary | Adjusted <i>P</i> Value |
| DMSO vs. 12.5 µM Nicotine           | 3.4        | −5.660 to 12.46    | No               | ns      | 0.7324                  |
| DMSO vs. 25 µM Nicotine             | 5.771      | −2.911 to 14.45    | No               | ns      | 0.2841                  |
| DMSO vs. 50 µM Nicotine             | 5.475      | −2.913 to 13.86    | No               | ns      | 0.299                   |
| 12.5 µM Nicotine vs. 25 µM Nicotine | 2.371      | −6.962 to 11.70    | No               | ns      | 0.8965                  |
| 12.5 µM Nicotine vs. 50 µM Nicotine | 2.075      | −6.985 to 11.13    | No               | ns      | 0.9214                  |
| 25 µM Nicotine vs. 50 µM Nicotine   | −0.2964    | −8.979 to 8.386    | No               | ns      | 0.9997                  |

| <b>Trabecula Length</b>                       |            |                    |                  |         |                         |
|-----------------------------------------------|------------|--------------------|------------------|---------|-------------------------|
| Tukey's multiple comparisons test             | Mean Diff. | 95.00% CI of diff. | Below threshold? | Summary | Adjusted <i>P</i> Value |
| DMSO vs. 12.5 $\mu$ M Nicotine                | 0.6333     | −3.235 to 4.501    | No               | ns      | 0.9687                  |
| DMSO vs. 25 $\mu$ M Nicotine                  | 3.693      | −0.01416 to 7.399  | No               | ns      | 0.0511                  |
| DMSO vs. 50 $\mu$ M Nicotine                  | 0.4825     | −3.224 to 4.189    | No               | ns      | 0.9838                  |
| 12.5 $\mu$ M Nicotine vs. 25 $\mu$ M Nicotine | 3.059      | −0.9254 to 7.044   | No               | ns      | 0.1761                  |
| 12.5 $\mu$ M Nicotine vs. 50 $\mu$ M Nicotine | −0.1508    | −4.135 to 3.834    | No               | ns      | 0.9996                  |
| 25 $\mu$ M Nicotine vs. 50 $\mu$ M Nicotine   | −3.21      | −7.038 to 0.6182   | No               | ns      | 0.1231                  |
| <b>Ethmoid Plate Length</b>                   |            |                    |                  |         |                         |
| Tukey's multiple comparisons test             | Mean Diff. | 95.00% CI of diff. | Below threshold? | Summary | Adjusted <i>P</i> Value |
| DMSO vs. 12.5 $\mu$ M Nicotine                | 5.329      | −1.395 to 12.05    | No               | ns      | 0.1583                  |
| DMSO vs. 25 $\mu$ M Nicotine                  | 10.09      | 3.592 to 16.58     | Yes              | **      | 0.0012                  |
| DMSO vs. 50 $\mu$ M Nicotine                  | 13.29      | 6.976 to 19.60     | Yes              | ****    | <0.0001                 |
| 12.5 $\mu$ M Nicotine vs. 25 $\mu$ M Nicotine | 4.759      | −1.965 to 11.48    | No               | ns      | 0.2379                  |
| 12.5 $\mu$ M Nicotine vs. 50 $\mu$ M Nicotine | 7.96       | 1.413 to 14.51     | Yes              | *       | 0.0127                  |
| 25 $\mu$ M Nicotine vs. 50 $\mu$ M Nicotine   | 3.201      | −3.112 to 9.514    | No               | ns      | 0.5191                  |
| <b>Ethmoid Plate Width</b>                    |            |                    |                  |         |                         |
| Tukey's multiple comparisons test             | Mean Diff. | 95.00% CI of diff. | Below threshold? | Summary | Adjusted <i>P</i> Value |
| DMSO vs. 12.5 $\mu$ M Nicotine                | 1.742      | −1.703 to 5.186    | No               | ns      | 0.5125                  |
| DMSO vs. 25 $\mu$ M Nicotine                  | 5.625      | 2.324 to 8.926     | Yes              | ***     | 0.0005                  |
| DMSO vs. 50 $\mu$ M Nicotine                  | 5.092      | 1.647 to 8.536     | Yes              | **      | 0.0024                  |
| 12.5 $\mu$ M Nicotine vs. 25 $\mu$ M Nicotine | 3.883      | 0.3346 to 7.432    | Yes              | *       | 0.0284                  |
| 12.5 $\mu$ M Nicotine vs. 50 $\mu$ M Nicotine | 3.35       | −0.3327 to 7.033   | No               | ns      | 0.0836                  |
| 25 $\mu$ M Nicotine vs. 50 $\mu$ M Nicotine   | −0.5333    | −4.082 to 3.015    | No               | ns      | 0.9752                  |

**Table S3.** Average distance from the live shoal minute by minute between the DMSO and 12.5  $\mu$ M Nicotine groups, when the shoal is visible. Statistical differences were only found in the minute 10 and 11 where the DMSO fish is closer to the stimulus than 12.5  $\mu$ M fish. \* =  $p < 0.05$ .

| Šídák's multiple comparisons test | Mean Diff. | 95.00% CI of diff. | Summary | Adjusted <i>P</i> Value |
|-----------------------------------|------------|--------------------|---------|-------------------------|
| DMSO - 12.5 $\mu$ M Nicotine      |            |                    |         |                         |
| 10                                | −8.500     | −16.58 to −0.4170  | *       | 0.0318                  |
| 11                                | −9.368     | −17.45 to −1.284   | *       | 0.0116                  |
| 12                                | 0.1338     | −7.949 to 8.217    | ns      | >0.9999                 |
| 13                                | 2.623      | −5.460 to 10.71    | ns      | 0.9922                  |
| 14                                | 4.023      | −4.060 to 12.11    | ns      | 0.8484                  |
| 15                                | 5.574      | −2.510 to 13.66    | ns      | 0.4343                  |
| 16                                | 5.884      | −2.199 to 13.97    | ns      | 0.3543                  |
| 17                                | 3.492      | −4.591 to 11.58    | ns      | 0.9348                  |
| 18                                | 6.162      | −1.921 to 14.24    | ns      | 0.2901                  |

---

|    |       |                 |    |        |
|----|-------|-----------------|----|--------|
| 19 | 5.582 | −2.501 to 13.67 | ns | 0.4319 |
| 20 | 3.023 | −5.060 to 11.11 | ns | 0.9762 |

---
